# Supplementary material
Source: Elsevier journal article supplement (https://www.sciencedirect.com/science/article/pii/S1134282X15001670)
Supplement: mmc1 [file S1134282X15001670:mmc1.doc]

Estimado compañero/a, como te hemos comentado en el correo que te hemos enviado, con el fin de conocer la percepción, conocimientos y actitudes que los profesionales del Área tenéis frente a la vacunación antigripal, desde el Servicio de Medicina Preventiva, te pedimos e invitamos a que cumplimentes la siguiente encuesta.

Tu participación es **totalmente anónima y por supuesto voluntaria**, y solo te llevará entre 5 y 10 minutos. 

Los resultados de la encuesta se usarán únicamente con fines de investigación y divulgación científica. 

**Gracias de antemano.**

| ***** | **1. Sexo:** | |  |
| --- | --- | --- | --- |
|  | Mujer | |  |
|  | Hombre | |  |
|  |  | |  |
| ***** | | **2. Fecha de nacimiento:** | |

|  |  |
| --- | --- |
| ***** | **3. Categoría profesional:** |
|  | Directivo |
|  | Jefe de Servicio Facultativo |
|  | Suervisora/Jefe de Bloque |
|  | FEA/Médico |
|  | DUE/Enfermera |
|  | Auxiliar de Enfermería |
|  | Técnico Especialista Sanitario |
|  | Celador |
|  | Personal Administrativo |
|  | Personal de Lavandería |
|  | Pinche de Cocina |
|  | Cocinero |
|  |  |

| ***** | **4. Servicio/UGC:** |
| --- | --- |
|  | Atención Primaria |
|  | Admisión/Atención al Usuario |
|  | Análisis Clínicos/Bioquímica |
|  | Anatomía Patológica |
|  | Archivo/Documentación |
|  | Bloque Quirúrgico |
|  | Cirugía General |
|  | Cirugía Ortopédica y Traumatología |
|  | Cocina |
|  | Dirección |
|  | Farmacia |
|  | Formación |
|  | Ginecología y Obstetricia |
|  | Hematología |
|  | Hospital de día |
|  | Informática |
|  | Lavandería |
|  | Logística |
|  | Mantenimiento/GICEA |
|  | Medicina Interna |
|  | Medicina Preventiva/Salud Pública |
|  | Microbiología |
|  | Oftalmología |
|  | Otorrinolaringología |
|  | Pediatría |
|  | Personal |
|  | Protección de la Salud |
|  | Radiodiagnóstico |
|  | Rehabilitación |
|  | UCI |
|  | UPRL/Ambiental |
|  | Urgencias |
|  | Urología |
|  |  |

| ***** | **5. ¿Te has vacunado frente a la Gripe este año?** |
| --- | --- |
|  | Si |
|  | No |
|  | No recuerdo |
|  | Prefiero no contestar |

|  |  |  |
| --- | --- | --- |
| ***** | **6. ¿Te has vacunado frente a la Gripe en los últimos 5 años?** |  |
|  | Todos los años |  |
|  | Algún año |  |
|  | Ninguna vez |  |
|  | No recuerdo |  |
|  | Prefiero no contestar |  |
|  |  |  |
|  | **7. En caso afrimativo ¿has tenido alguna reacción adversa a la vacuna? Puedes elegir mas de una respuesta:** | |

|  | Ninguna reacción |
| --- | --- |
|  | Reacción local (dolor y/o inchazón en el lugar del pinchazo) |
|  | Malestar general |
|  | Mialgias (dolor muscular) y/o dolor articular |
|  | Fiebre |
|  | Reacción grave diagnosticada (Guillain-Barre, vasculitis, trombocitopenia, linfadenopatía, reacciones alergicas graves...) |
|  | No sé |
|  | Prefiero no contestar |
|  |  |
| ***** | **8. ¿Padeces alguna de las siguientes patologías crónicas? Puedes elegir mas de una respuesta:** |

|  | Diabetes |  |
| --- | --- | --- |
|  | Insuficiencia Renal Crónica |  |
|  | Enfermedades de la sangre |  |
|  | Patología respiratoria (displasia, fibrosis, asma...) |  |
|  | Patología cardiovascular |  |
|  | Obesidad |  |
|  | No padezco ninguna de estas enfermedades |  |
|  | No sé |  |
|  | Prefiero no contestar |  |
|  |  |  |
| ***** | **9. ¿Con quién convives en casa? Puedes elegir más de una respuesta:** | |

|  | Solo |  |
| --- | --- | --- |
|  | Pareja |  |
|  | Hijos MENORES de 14 años |  |
|  | Hijos MAYORES de 14 años |  |
|  | Mayores de 65 años |  |
|  | Enfermos crónicos |  |
|  | No sé |  |
|  | Prefiero no contestar |  |
|  |  |  |
| ***** | **10. ¿Como recibes información de la Gripe? Puedes elegir más de una respuesta:** | |

|  | No recibo ninguna información |  |
| --- | --- | --- |
|  | Revistas científicas |  |
|  | Profesionales sanitarios |  |
|  | Medios de comunicación (prensa, radio, televisión) |  |
|  | Internet |  |
|  | Redes sociales |  |
|  | Amigos o familiares |  |
|  | No sé |  |
|  | Prefiero no contestar |  |
|  |  |  |
| ***** | **11. ¿Crees que la Gripe es una enfermedad grave?** | |

|  | Si, puede ser grave para cualquier persona |  |
| --- | --- | --- |
|  | No |  |
|  | Solo puede ser grave en pacientes de riesgo |  |
|  | No sé |  |
|  | Prefiero no contestar |  |
|  |  |  |
| ***** | **12. ¿Crees que la Gripe es una enfermedad mortal?** | |

|  | Si, puede ser mortal para cualquier persona |  |
| --- | --- | --- |
|  | No |  |
|  | Solo puede ser mortal en pacientes de riesgo |  |
|  | No sé |  |
|  | Prefiero no contestar |  |
|  |  |  |
|  |  |  |
|  | **13. ¿Por qué te vacunas? Puedes elegir más de una respuesta (contestar solo si te has vacunado alguna vez):** | |

|  | Protección propia |  |
| --- | --- | --- |
|  | Proteger a mis familiares |  |
|  | Proteger a los pacientes |  |
|  | Otros motivos |  |
|  | No sé |  |
|  | Prefiero no contestar |  |
|  |  |  |
|  | **14. ¿Por qué No te vacunas? Puedes elegir mas de una respuesta (contesta si NO te has vacunado este año):** | |

|  | No tengo riesgo |  |
| --- | --- | --- |
|  | No es una enfermedad grave |  |
|  | No he tenido tiempo u ocasión de vacunarme |  |
|  | La vacuna no sirve |  |
|  | Miedo a reacciones adversas |  |
|  | Miedo a las vacunas en general |  |
|  | Tengo criterios de contraindicación de la vacuna |  |
|  | Otro motivo |  |
|  | No sé |  |
|  | Prefiero no contestar |  |
|  |  |  |
| ***** | **15. ¿Crees que la vacunación antigripal es RECOMENDABLE para los trabajadores del área sanitaria?** | |

|  | No es recomendable |  |
| --- | --- | --- |
|  | Si, es recomendable para todos los profesionales |  |
|  | Solo es recomendable para personal sanitario |  |
|  | No sé |  |
|  | Prefiero no contestar |  |
|  |  |  |
| ***** | **16. ¿Crees que la vacunación antigripal es NECESARIA para los trabajadores del área sanitaria?** | |

|  | No es necesaria |  |
| --- | --- | --- |
|  | Si, es necesaria para todos los profesionales |  |
|  | Solo es necesaria para personal sanitario |  |
|  | No sé |  |
|  | Prefiero no contestar |  |
|  |  |  |
|  | **17. ¿Quieres comentarnos cualquier otra cosa sobre la vacuna de la Gripe? Por favor, no dudes en hacerlo:** | |
|  |  | |
